# Supplementary material
Source: HighWire-hosted journal article supplement (https://adc.bmj.com/content/106/3/224)
Supplement: inline-supplementary-material-2 [file inline-supplementary-material-2.pdf]

Online appendix II

## Training course in Hospital Care for Children and Quality Improvement

**Day 1 - Monday - Respiratory disease, oxygen therapy, the stages of management of any sick child**

| Time        | Activity                                                                                                                                                                                                                                                                                                                                                                                                                                                                                          | Presenter                             |
|-------------|---------------------------------------------------------------------------------------------------------------------------------------------------------------------------------------------------------------------------------------------------------------------------------------------------------------------------------------------------------------------------------------------------------------------------------------------------------------------------------------------------|---------------------------------------|
| 0830-0845   | Opening, Welcome                                                                                                                                                                                                                                                                                                                                                                                                                                                                                  |                                       |
| 0845 – 0915 | Introduction to the Hospital Care for Children program<br>Introductions of participants and facilitators<br>Aims and objectives of the workshop: <ul style="list-style-type: none"> <li>• To be able to use the Hospital Care for Children guidelines in everyday clinical practice</li> <li>• To understand the stages of management of any sick child</li> <li>• Train in the use oxygen concentrators and pulse oximeters</li> <li>• Train in quality improvement in pediatric care</li> </ul> |                                       |
| 0915-1030   | Cough and difficult breathing, clinical case II<br>Child with severe respiratory distress<br>The stages of management of any sick child                                                                                                                                                                                                                                                                                                                                                           |                                       |
| 1030 – 1100 | Tea break                                                                                                                                                                                                                                                                                                                                                                                                                                                                                         |                                       |
| 1100-1130   | Respiratory case videos                                                                                                                                                                                                                                                                                                                                                                                                                                                                           |                                       |
| 1130 -1300  | Practical, hand-on training in oxygen concentrators, oximeters, oxygen analysers.                                                                                                                                                                                                                                                                                                                                                                                                                 | Biomedical engineer                   |
| 1300-1400   | Lunch break                                                                                                                                                                                                                                                                                                                                                                                                                                                                                       |                                       |
| 1400-1600   | Practice on the paediatric ward<br>Small groups, coaching method of teaching<br>Problem solving                                                                                                                                                                                                                                                                                                                                                                                                   | All facilitators, small groups of 4-5 |
| 1600 – 1630 | Tea break                                                                                                                                                                                                                                                                                                                                                                                                                                                                                         |                                       |
| 1630-1630   | Recap, discussion and questions                                                                                                                                                                                                                                                                                                                                                                                                                                                                   |                                       |

## Online appendix II

**Day 2 – Tuesday – Diarrhoea, Fever and Malnutrition**

| <b>Time</b> | <b>Activity</b>                                                                                                                                                               | <b>Presenter</b>                      |
|-------------|-------------------------------------------------------------------------------------------------------------------------------------------------------------------------------|---------------------------------------|
| 0830-0930   | Diarrhoea and dehydration                                                                                                                                                     |                                       |
| 0930-1030   | Fever, clinical case                                                                                                                                                          |                                       |
| 1030 – 1100 | Tea break                                                                                                                                                                     |                                       |
| 1100 – 1230 | Severe malnutrition, clinical case                                                                                                                                            |                                       |
| 1230- 1330  | Lunch break                                                                                                                                                                   |                                       |
| 1330-1600   | Clinical practice using the WHO guidelines in Paediatric ward<br>Small groups, coaching method of teaching, problem solving<br>Practical oxygen concentrator teaching in ward | All facilitators, small groups of 4-5 |
| 1600-1630   | Recap, discussion and questions                                                                                                                                               |                                       |

## Online appendix II

**Day 3 – Wednesday – Neonatal Care**

| <b>Time</b> | <b>Activity</b>                                                                                                                             | <b>Presenter</b>                      |
|-------------|---------------------------------------------------------------------------------------------------------------------------------------------|---------------------------------------|
| 0815-0830   | Neonatal illness in Papua New Guinea - overview                                                                                             |                                       |
| 0830-0900   | Early Essential Newborn Care                                                                                                                |                                       |
| 0900 – 0945 | Young infants with infections, clinical case                                                                                                |                                       |
| 0945 – 1030 | The low birth weight baby, clinical case                                                                                                    |                                       |
| 1030 - 1045 | Tea break                                                                                                                                   |                                       |
| 1045 – 1200 | Birth asphyxia, clinical case<br>Practical training: Neonatal resuscitation and Early Essential Newborn Care<br>Coaching method of teaching |                                       |
| 1200-1230   | Clinical signs of serious neonatal illnesses                                                                                                |                                       |
| 1300 - 1400 | Lunch break                                                                                                                                 |                                       |
| 1400 - 1600 | Clinical practice in Neonatal Ward<br>Safe oxygen use in neonatal care<br>Problem solving                                                   | All facilitators, small groups of 4-5 |
| 1600 - 1630 | Recap, discussion, sharing of experiences                                                                                                   |                                       |

## Online appendix II

**Day 4 – Thursday - HIV, TB and chronic illnesses in children and adolescents**

|           |                                                                                                                         |                                          |
|-----------|-------------------------------------------------------------------------------------------------------------------------|------------------------------------------|
| 0830-0900 | Chronic illnesses in children and adolescent health overview                                                            |                                          |
| 0900-1000 | HIV, clinical care                                                                                                      |                                          |
| 1000-1100 | Tuberculosis, clinical case                                                                                             |                                          |
| 1100-1130 | Tea break                                                                                                               |                                          |
| 1130-1215 | How to recognize multi-drug resistant tuberculosis in children (MDR-TB)                                                 |                                          |
| 1215-1300 | Rheumatic heart disease, clinical case                                                                                  |                                          |
| 1300-1400 | Lunch break                                                                                                             |                                          |
| 1400-1600 | Clinical practice on the Paediatric ward<br>Talking to adolescents about health concerns<br>Coaching method of teaching | All facilitators,<br>small groups of 4-5 |
| 1600-1630 | Tea break                                                                                                               |                                          |
| 1630-1700 | Recap, discussion, sharing of experiences                                                                               |                                          |

## Online appendix II

**Day 5. Friday – Surgical problems and preventing infections**

|           |                                                                                                                                                                                                                                                                           |  |
|-----------|---------------------------------------------------------------------------------------------------------------------------------------------------------------------------------------------------------------------------------------------------------------------------|--|
| 0800-0915 | Burns in children                                                                                                                                                                                                                                                         |  |
| 0915-1030 | Trauma and drowning in children                                                                                                                                                                                                                                           |  |
| 1030-1100 | Revision<br>Prevention of hospital-acquired infections <ul style="list-style-type: none"> <li>• The 5 moments of hand-hygiene and other infection control procedures</li> <li>• Preventing spread of respiratory viruses, use of personal protective equipment</li> </ul> |  |
| 1030-1100 | Tea break                                                                                                                                                                                                                                                                 |  |
| 1100-1200 | Mortality auditing and continuous quality improvement                                                                                                                                                                                                                     |  |
| 1200-1300 | Lunch break                                                                                                                                                                                                                                                               |  |
| 1300-1400 | Quiz on Hospital Care for Children, Oxygen concentrators and Quality Improvement                                                                                                                                                                                          |  |
| 1400-1430 | Test discussion and feedback                                                                                                                                                                                                                                              |  |
| 1430      | Presentation of certificates, close                                                                                                                                                                                                                                       |  |

**Course material available at:**

<https://pngpaediatricsociety.org/hospital-care-for-children-training-modules/>
